# Supplementary material
Source: PubMed Central journal article supplement (PMC3071386)
Supplement: 100685_3.pdf [file 100685_3.pdf]

Appendix 3 (as supplied by the authors): Adjusted odds, with 95% confidence intervals, of missing the ACC/AHA benchmark door-to-needle time of 30 minutes in acute myocardial infarction patients

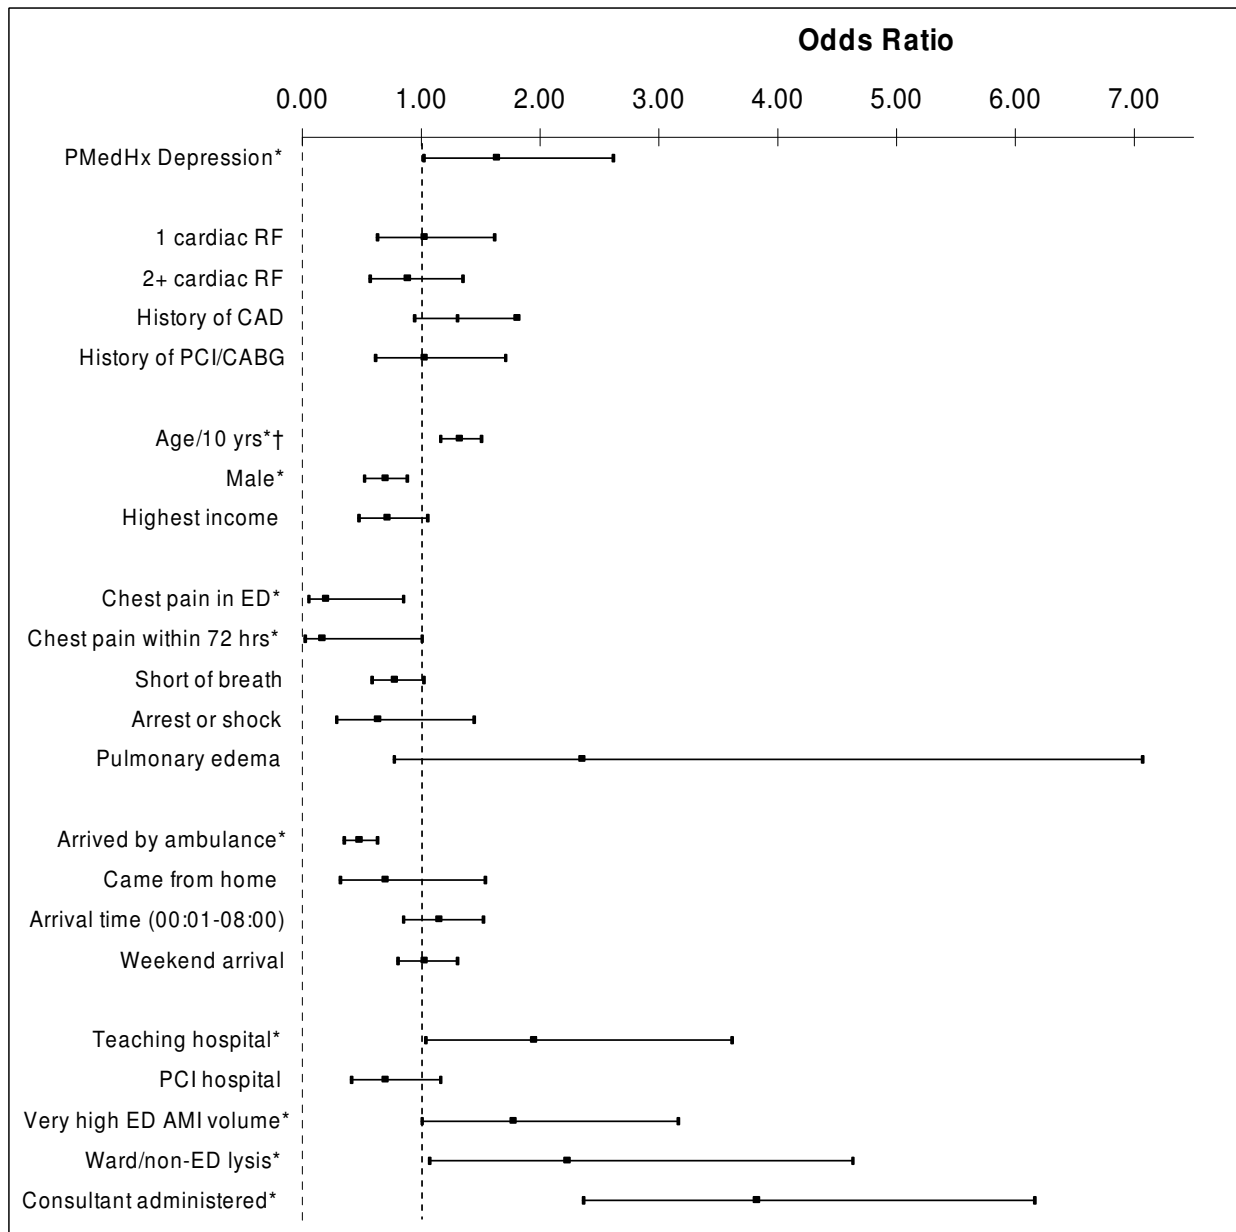

PMedHx: past medical history; RF: risk factor (diabetes mellitus, hypertension, smoker, or dyslipidemia); CAD: coronary artery disease; PCI: percutaneous coronary intervention; CABG: coronary artery bypass graft; ED: emergency department; AMI: acute myocardial infarction (low 0-100/year; moderate 101-200/year, high 201-300/year; very high 301+/year)

\* $p \leq 0.05$

† Odds of meeting the benchmark time per every 10 year increase in age
