# Supplementary material
Source: PubMed Central journal article supplement (PMC3071386)
Supplement: 100685_4.pdf [file 100685_4.pdf]

Appendix 4 (as supplied by the authors): Adjusted odds, with 95% confidence intervals, of missing the ACC/AHA benchmark door-to-balloon time of 90 minutes in acute myocardial infarction patients

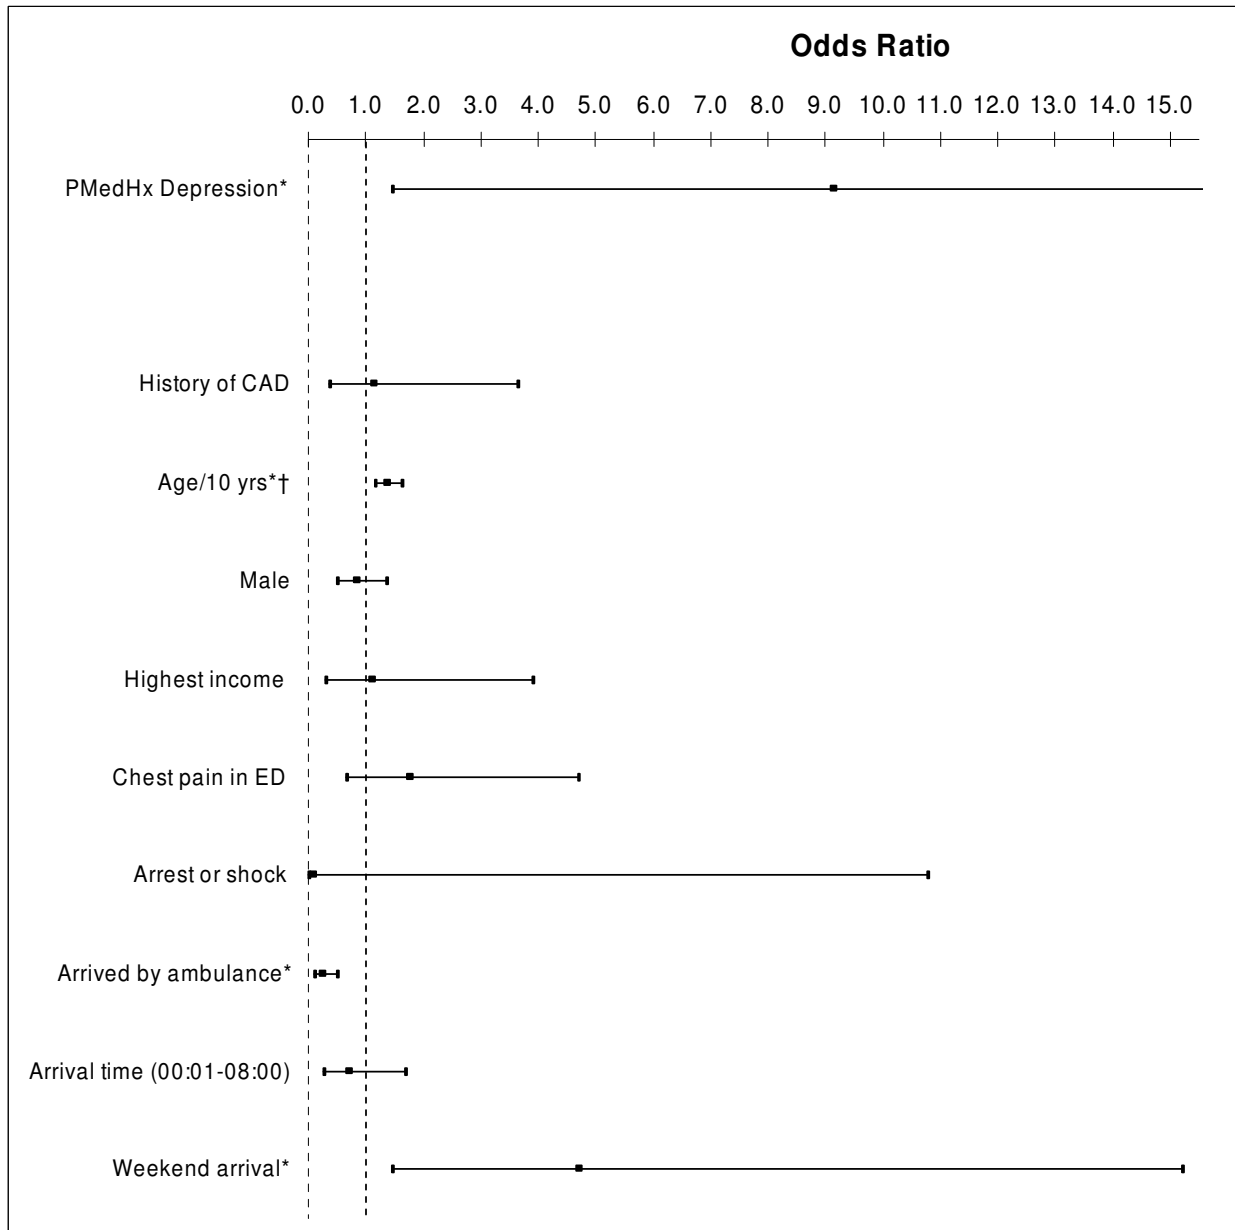

PMedHx: past medical history; CAD: coronary artery disease; ED: emergency department

\* $p \leq 0.05$

† Odds of meeting the benchmark time per every 10 year increase in age
